# Supplementary material
Source: publisher figshare collection journal article supplement (https://frontiersin.figshare.com/ndownloader/files/29127843)
Supplement: Supplementary file 1 [file 29127843]

**Table three: Wildfire smoke consequences, COVID concerns, policy solutions**

| **Source of coverage**  **[Total]** | **Details consequences of wildfire smoke** | **Relates COVID Concerns** | **Discusses non-climate policy solutions** | **Discusses national climate policy solutions** |
| --- | --- | --- | --- | --- |
| **Australian  Domestic**  [25] | 8% 2 | 4% 1 | 24%  6 | 0 |
| **Australian International**  [10] | 20% 2 | 20% 2 | 20%  2 | 10%  1 |
| **Canadian  Domestic**  [11] | 54% 6 | 9% 1 | 0 | 0 |
| **Canadian International**  [0] | 0 | 0 | 0 | 0 |
| **Europe**  **Domestic**  [16] | 18% 3 | 18% 3 | 12%  2 | 6%  1 |
| **Europe**  **International**  [14] | 35% 5 | 7% 1 | 28%  4 | 0 |
| **United Kingdom Domestic**  [8] | 25% 2 | 12% 1 | 25%  2 | 0 |
| **United Kingdom International**  [0] | 0 | 0 | 0 | 0 |
| **United States**  **Domestic**  [47] | 40% 19 | 2% 1 | 34%  16 | 12%  6 |
| **United States  International**  [19] | 36% 7 | 0 | 0 | 0 |
| **Total  Coverage**  [150] | 30% 46 | 6% 10 | 21%  32 | 5%  8 |
